# Supplementary material for: Quantification of Metal(loid)s in Lubricating Eye Drops Used in the Treatment of Dry Eye Disease
Source: MDPI journal article supplement (doi:10.3390/molecules28186508), 2023-09-07
Supplement: s1 [file s1]

Supplementary material

# Quantification of Metal(loid)s in Lubricating Eye Drops Used in the Treatment of Dry Eye Disease

Marcelo de Oliveira <sup>1,2</sup>, Elaine S. de Pádua Melo <sup>2</sup>, Thaís Carvalho da Silva <sup>2</sup>, Carla Maiara Lopes Cardozo <sup>1,2</sup>, Igor Valadares Siqueira <sup>2</sup>, Mariana Pereira Hamaji <sup>2</sup>, Vanessa Torres Braga <sup>1</sup>, Luiz Fernando Taranta Martin <sup>2</sup>, Alessandro Fonseca <sup>2</sup> and Valter Aragão do Nascimento <sup>1,2,\*</sup>

<sup>1</sup> Graduate Program in Health and Development in the Central-West Region of Brazil, Federal University of Mato Grosso do Sul, Campo Grande 79079-900, Brazil; mdeoliveira@gmail.com (M.d.O.); nutricarlalopes@gmail.com (C.M.L.C.); nessatorresb@hotmail.com (V.T.B.)

<sup>2</sup> Group of Spectroscopy and Bioinformatics Applied to Biodiversity and Health, School of Medicine, Postgraduation Program in Health and Development in the Midwest Region, Faculty of Medicine, Federal University of Mato Grosso do Sul, Campo Grande 79079-900, Brazil; elainesp Melo@hotmail.com (E.S.d.P.M.); tata.silva1772@gmail.com (T.C.d.S.); igorvaladares@gmail.com (I.V.S.); marihamaji@gmail.com (M.P.H.); luiztaranta@gmail.com (L.F.T.M.); acfms2005@gmail.com (A.F.)

\* Correspondence: aragao60@hotmail.com

**Table S1.** Statistical test used in view of the results of the Table 2 on concentration of quantified metal(loid)s in lubricating eye drops.

| Element | Eye drops 1* | Eye drops 2* | Eye drops 3*  | Eye drops 4*  | Eye drops 5*  | Eye drops 6*  | Eye drops 7* |
|---------|--------------|--------------|---------------|---------------|---------------|---------------|--------------|
| Al      | a            | < LOD        | < LOD         | < LOD         | < LOD         | < LOD         | < LOD        |
| As      | a            | b            | ac            | acd           | acde          | acdef         | adg          |
| Ba      | a            | ab           | c             | bd            | bde           | bdef          | abdefg       |
| Cd      | a            | ab           | abc           | ad            | acde          | acdef         | abcdefg      |
| Co      | a            | ab           | abc           | bcd           | e             | abcdf         | abcdfg       |
| Cr      | < LOD        | < LOD        | < LOD         | < LOD         | < LOD         | < LOD         | < LOD        |
| Cu      | a            | ab           | abc           | abcd          | abde          | abcdef        | abdefg       |
| Fe      | a            | < LOD        | ac            | < LOD         | < LOD         | df            | < LOD        |
| Mg      | a            | ab           | abc           | < LOD         | e             | < LOD         | g            |
| Mn      | a            | ab           | bc            | cd            | cde           | cdef          | cdefg        |
| Mo      | a            | b            | ac            | d             | acde          | acdef         | acefg        |
| Ni      | a            | b            | c             | cd            | cde           | cdef          | ag           |
| Pb      | < LOD        | b            | < LOD         | < LOD         | < LOD         | < LOD         | < LOD        |
| Se      | a            | b            | ac            | acd           | acde          | acdef         | acdeg        |
| V       | a            | ab           | abc           | acd           | bce           | acdf          | abcdeg       |
| Zn      | a            | b            | c             | d             | e             | cdf           | cdg          |
| Element | Eye drops 8* | Eye drops 9* | Eye drops 10* | Eye drops 11* | Eye drops 12* | Eye drops 13* |              |
| Al      | < LOD        | < LOD        | < LOD         | < LOD         | l             | m             |              |
| As      | h            | hi           | bhij          | gk            | bkl           | bklm          |              |
| Ba      | abgh         | ahi          | abdfghj       | abdefgjk      | abdefgjkl     | abdefgijklm   |              |
| Cd      | abcdefgh     | abcfghi      | abcdefghij    | adefghk       | abcdefghijkl  | abdefghijklm  |              |
| Co      | abcdfgh      | abcfghi      | abcdfghij     | abcdfghijk    | abcdfghijkl   | abcdfghijklm  |              |
| Cr      | < LOD        | i            | < LOD         | ik            | < LOD         | < LOD         |              |
| Cu      | abcdefgh     | abcfghi      | abcdefghij    | abdefghijk    | abdefghijkl   | abdefghijklm  |              |
| Fe      | dfh          | < LOD        | < LOD         | < LOD         | l             | m             |              |
| Mg      | abch         | i            | abchj         | gk            | gkl           | abchjm        |              |

| Mn      | abh           | abhi           | abcfgj          | cdefgjk          | abcdfgjkl          | abchijlm           |
|---------|---------------|----------------|-----------------|------------------|--------------------|--------------------|
| Mo      | bh            | bhi            | bhij            | acgk             | acgkl              | acefgklm           |
| Ni      | h             | bhi            | bhij            | agk              | bgikl              | bgklm              |
| Pb      | bh            | bi             | bhij            | hk               | bhkl               | bhklm              |
| Se      | bh            | i              | bhj             | acdegk           | bhjl               | bhjklm             |
| V       | abcdefgh      | i              | abcdefghj       | abcdefghjk       | l                  | elm                |
| Zn      | h             | cdgi           | j               | k                | dl                 | m                  |
| Element | Eye drops 14* | Eye drops 15** | Eye drops 16**  | Eye drops 17**   | Eye drops 18**     | Eye drops 19**     |
| Al      | an            | ano            | < LOD           | < LOD            | r                  | < LOD              |
| As      | gklmn         | acdefo         | bijp            | adgknq           | r                  | gknqs              |
| Ba      | bdefgijklmn   | bdefgikmno     | cp              | q                | bdefgijklmnor      | ahis               |
| Cd      | defgkmn       | abcdefghijklmo | abcdefghijklmnp | adefgklmnpq      | abcdefghijklmnopqr | adefghijklmnopqrs  |
| Co      | abdefgijklmn  | abdefghijklmno | abdefghijklmnop | abdefghijklmnopq | abdefghijklmnopqr  | abdefghijklmnopqrs |
| Cr      | < LOD         | < LOD          | < LOD           | < LOD            | < LOD              | s                  |
| Cu      | abdefghijklmn | abdefghijklmno | abdefghijklmnop | abcfhiq          | abdefghijklmnopqr  | abdefghijklmnoprs  |
| Fe      | < LOD         | o              | < LOD           | < LOD            | mr                 | dfhos              |
| Mg      | abchjmn       | abchjmno       | < LOD           | < LOD            | abchjmnor          | < LOD              |
| Mn      | cdefgklmn     | cdefgiklno     | cdefgknop       | cdefgklmnopq     | abchijlmnr         | cdefgklmnopqs      |
| Mo      | acdefgkmn     | defno          | acefklmnop      | defgnoq          | defoqr             | acdefgmnopqrs      |
| Ni      | acefn         | cefno          | adgknp          | cdefnoq          | acdefnoqr          | cdefnoqrs          |
| Pb      | < LOD         | < LOD          | < LOD           | < LOD            | < LOD              | < LOD              |
| Se      | bcdgklmn      | acdefgkno      | ip              | abcdgklmnoq      | fr                 | bhjklmnqs          |
| V       | abcdfhjkn     | abcdfghjkno    | abcdfhjknop     | abcdfhjknopq     | abcdeghjkor        | abcdfhjknopqs      |
| Zn      | en            | o              | op              | opq              | enr                | s                  |

Notes: \* With preservative; \*\* without preservative; < LOD - Analyte concentrations were below detection limits; different letters on the same line represent statistical differences between samples ( $p < 0.05$ ) by one-way ANOVA with post hoc Tukey's test; P value in the line referring to the comparisons between the concentrations of lubricating eye drops for the elements Al, As, Ba, Cd, Co, Cr, Cu, Fe, Mn, Mo, Ni, Pb, Se, V and Zn ( $p < 0.0001$ ), Cr and Mg ( $p = 0.0001$ ).

**Table S2.** Statistical test used in view of the results of the Table 3 on values of daily instillation of lubricating eye drops.

| Element | Eye drops 1* | Eye drops 2* | Eye drops 3*  | Eye drops 4*  | Eye drops 5*  | Eye drops 6*  | Eye drops 7* |
|---------|--------------|--------------|---------------|---------------|---------------|---------------|--------------|
| Al      | a            | < LOD        | < LOD         | < LOD         | < LOD         | < LOD         | < LOD        |
| As      | a            | b            | c             | ad            | ade           | acdef         | g            |
| Ba      | a            | b            | ac            | bd            | abde          | bdef          | acg          |
| Cd      | a            | ab           | c             | d             | ae            | abf           | eg           |
| Co      | a            | ab           | abc           | abcd          | de            | abcdf         | abcdfg       |
| Cr      | < LOD        | < LOD        | < LOD         | < LOD         | < LOD         | < LOD         | < LOD        |
| Cu      | a            | ab           | abc           | abcd          | abcde         | abcdef        | abcdefg      |
| Fe      | a            | < LOD        | c             | < LOD         | < LOD         | f             | < LOD        |
| Mg      | a            | ab           | abc           | < LOD         | e             | < LOD         | g            |
| Mn      | a            | b            | c             | cd            | cde           | cdef          | befg         |
| Mo      | a            | b            | c             | cd            | ae            | aef           | bg           |
| Ni      | a            | b            | c             | cd            | cde           | cdef          | bg           |
| Pb      | < LOD        | b            | < LOD         | < LOD         | < LOD         | < LOD         | < LOD        |
| Se      | a            | ab           | c             | ad            | ae            | adf           | beg          |
| V       | a            | ab           | abc           | abcd          | e             | abcdf         | eg           |
| Zn      | a            | b            | c             | cd            | cde           | f             | bg           |
| Element | Eye drops 8* | Eye drops 9* | Eye drops 10* | Eye drops 11* | Eye drops 12* | Eye drops 13* |              |
| Al      | < LOD        | < LOD        | < LOD         | < LOD         | l             | m             |              |
| As      | h            | i            | hj            | bgk           | il            | ilm           |              |
| Ba      | acgh         | acghi        | hij           | abcefgk       | hijl          | acghijm       |              |
| Cd      | aegh         | aefghi       | j             | abfik         | jl            | jlm           |              |
| Co      | abcfgh       | abcfghi      | abcfghij      | abcdfghijk    | abcfghijkl    | abcdfghijklm  |              |
| Cr      | < LOD        | i            | < LOD         | ik            | < LOD         | < LOD         |              |
| Cu      | abcdefgh     | abcdefghi    | abcdefghij    | abcdefgjk     | abcdefghijkl  | abcdefghijklm |              |
| Fe      | fh           | < LOD        | < LOD         | < LOD         | l             | m             |              |
| Mg      | abch         | i            | abchj         | gk            | l             | abchjm        |              |
| Mn      | ah           | ahi          | hij           | bcdefgk       | ahijl         | hjlm          |              |
| Mo      | h            | hi           | j             | abgk          | hil           | bghim         |              |

| Ni      | h             | gi              | j              | bgk               | hl                 | him               |
|---------|---------------|-----------------|----------------|-------------------|--------------------|-------------------|
| Pb      | bh            | bi              | bij            | bhk               | bhkl               | bhkml             |
| Se      | h             | hi              | j              | begk              | jl                 | ilm               |
| V       | abcdfgh       | i               | abcdefghj      | abcdefghjk        | il                 | m                 |
| Zn      | h             | fi              | hj             | k                 | fil                | m                 |
| Element | Eye drops 14* | Eye drops 15**  | Eye drops 16** | Eye drops 17**    | Eye drops 18**     | Eye drops 19**    |
|         | an            | ano             | < LOD          | < LOD             | mr                 | < LOD             |
| As      | bgkn          | adefo           | adefop         | cq                | qr                 | fqs               |
| Ba      | abcefgkln     | abdefkno        | bdfp           | abcefgknoq        | dpr                | prs               |
| Cd      | abefhikn      | aeghino         | p              | pq                | cr                 | pqs               |
| Co      | abcdfghkmn    | abcd,fghijklmno | acdfkmnp       | cdfmnpq           | abcdfghijklmnopqr  | abcdfgkmlnopqrs   |
| Cr      | < LOD         | < LOD           | < LOD          | < LOD             | < LOD              | s                 |
| Cu      | bcdefgijklmn  | abcdefgijklmno  | bcdefgijklmnop | abcdefghijklmnopq | abcdefghijklmnopqr | bcdefgijklmnopqrs |
| Fe      | < LOD         | co              | < LOD          | < LOD             | r                  | fhs               |
| Mg      | abchjmn       | abchjmno        | < LOD          | < LOD             | abchjmnor          | < LOD             |
| Mn      | bfgkn         | bcdefgkno       | p              | pq                | bcdefgknor         | cpqs              |
| Mo      | abegkn        | aefo            | p              | pq                | cdpr               | pqs               |
| Ni      | an            | cdefo           | cdfp           | cdpq              | cdefopr            | cdpqs             |
| Pb      | < LOD         | < LOD           | < LOD          | < LOD             | < LOD              | < LOD             |
| Se      | ghkn          | abeko           | cp             | q                 | cpqr               | pqrs              |
| V       | abcdfh        | abcdfhjkno      | abcdfnop       | abcdfnopq         | abcdfghjknor       | abcdfnopqs        |
| Zn      | cden          | o               | p              | pq                | or                 | fils              |

Notes: \* With preservative; \*\* without preservative; < LOD - Analyte concentrations were below detection limits; different letters on the same line represent statistical differences between samples ( $p < 0.05$ ) by one-way ANOVA with post hoc Tukey's test; P value in the line referring to comparisons between daily exposures by instillation of lubricating eye drops for the elements Al, As, Ba, Cd, Co, Fe, Mg, Mn, Mo, Ni, Se, V and Zn ( $p < 0.0001$ ), Cr ( $p = 0.0062$ ), Fe ( $p = 0.0002$ ) and Pb ( $p = 0.0001$ ).
